# Supplementary material for: Photochemical Processing of Dissolved Organic Matter in Fog Water: Oxidation and Functionalization Pathways Driving Organic Aerosol Evolution
Source: Copernicus journal article supplement (doi:10.5194/egusphere-2025-3949), 2025-08-28
Supplement: Supplementary file 1 [file egusphere-2025-3949-supplement.pdf]

## Supplementary Information

### **Photochemical Processing of Dissolved Organic Matter in Fog Water: Oxidation and Functionalization Pathways Driving Organic Aerosol Evolution**

Wenqing Jiang<sup>1,2</sup>, Lijuan Li<sup>1,3</sup>, Lu Yu<sup>1,2</sup>, Hwajin Kim<sup>1,4</sup>, Yele Sun<sup>1,5</sup>, Qi Zhang<sup>1,2\*</sup>

<sup>1</sup>Department of Environmental Toxicology, University of California, 1 Shields Ave.,  
Davis, CA 95616, USA

<sup>2</sup>Agricultural and Environmental Chemistry Graduate Group, University of California, 1  
Shields Ave., Davis, CA 95616, USA

<sup>3</sup> Research Center for Atmospheric Environment, Chongqing Institute of Green and  
Intelligent Technology, Chinese Academy of Sciences, Chongqing 400714, China

<sup>4</sup> Department of Environmental Health Sciences, Seoul National University, Seoul 08826,  
South Korea

<sup>5</sup> State Key Laboratory of Atmospheric Environment and Extreme Meteorology, Institute  
of Atmospheric Physics, Chinese Academy of Sciences, Beijing 100029, China

\*Corresponding Author: Qi Zhang, Department of Environmental Toxicology, University  
of California, 1 Shields Ave., Davis, CA 95616, USA. Tel.: 530-752-5779; fax: 530-752-  
3394; e-mail: [dkwzhang@ucdavis.edu](mailto:dkwzhang@ucdavis.edu)

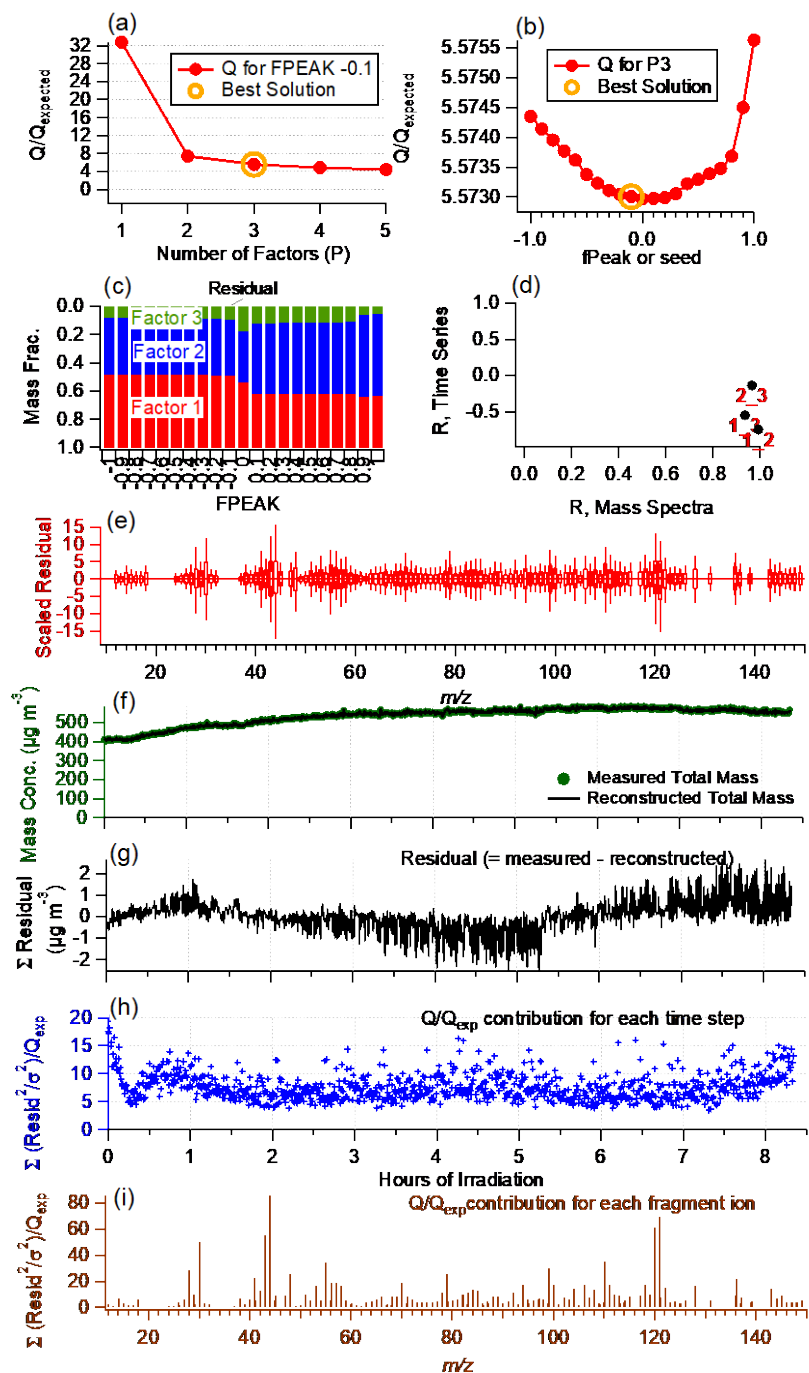

**Figure S1.** Summary of key diagnostic plots of the PMF results: (a)  $Q/Q_{exp}$  as a function of number of factors ( $p$ ) selected for PMF analysis. For the best solution (3-factor solution) (b)  $Q/Q_{exp}$  as a function of  $fPeak$ , (c) fractions of PMF factors vs.  $fPeak$ , (d) correlations among PMF factors, (e) the box and whiskers plot showing the distributions of scaled residuals for each  $m/z$ , (f) time series of the measured organic mass and the reconstructed organic mass, (g) variations of the residual (= measured - reconstructed) of the fit, (h) the  $Q/Q_{exp}$  for each point in time, and (i) the  $Q/Q_{exp}$  values for each ion.

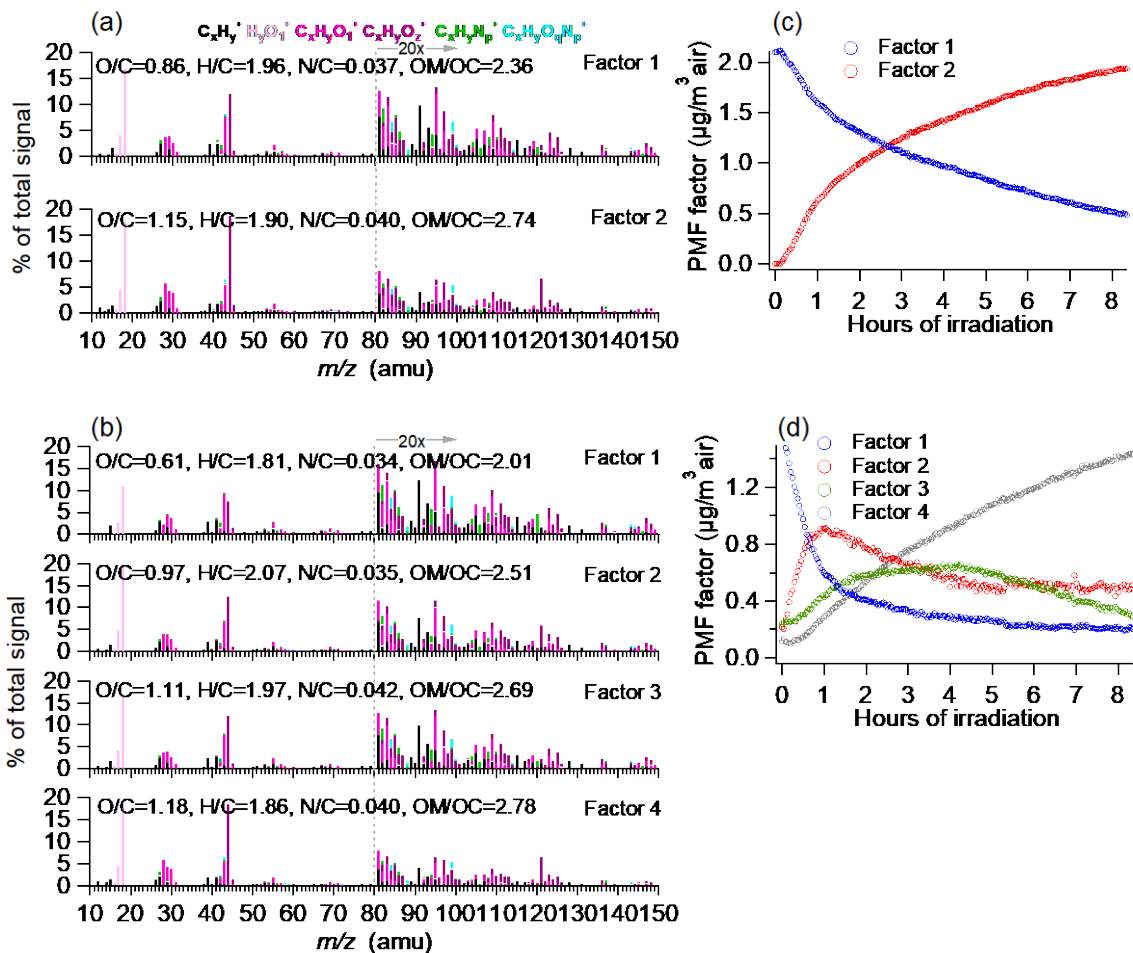

**Figure S2.** HR-AMS spectra for **(a)** two-factor PMF solutions and **(b)** four-factor PMF solutions. Peaks are colored by the six ion categories:  $C_xH_y^+$ ,  $H_yO_1^+$ ,  $C_xH_yO_1^+$ ,  $C_xH_yO_z^+$ ,  $C_xH_yN_p^+$ , and  $C_xH_yO_qN_p^+$ . The ion signals at  $m/z \geq 80$  are enhanced by a factor of 20 for clarity. The calculated atomic ratios are shown in the legends. Time series of **(c)** two-factor PMF solutions and **(d)** four-factor PMF solutions.

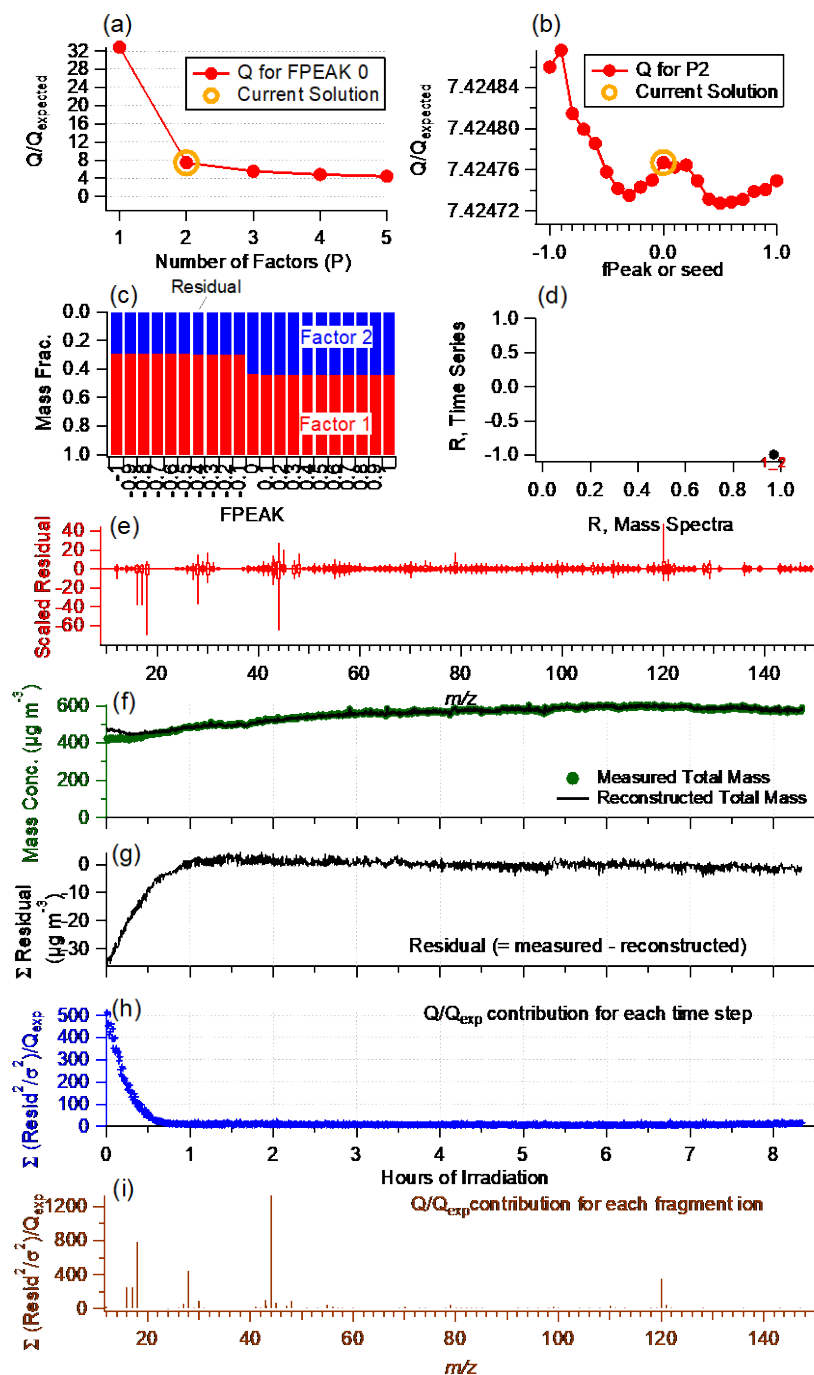

**Figure S3.** Summary of key diagnostic plots of the PMF results: (a)  $Q/Q_{exp}$  as a function of number of factors ( $p$ ) selected for PMF analysis. For the 2-factor solution (b)  $Q/Q_{exp}$  as a function of  $fPeak$ , (c) fractions of PMF factors vs.  $fPeak$ , (d) correlations among PMF factors, (e) the box and whiskers plot showing the distributions of scaled residuals for each  $m/z$ , (f) time series of the measured organic mass and the reconstructed organic mass, (g) variations of the residual (= measured - reconstructed) of the fit, (h) the  $Q/Q_{exp}$  for each point in time, and (i) the  $Q/Q_{exp}$  values for each ion.

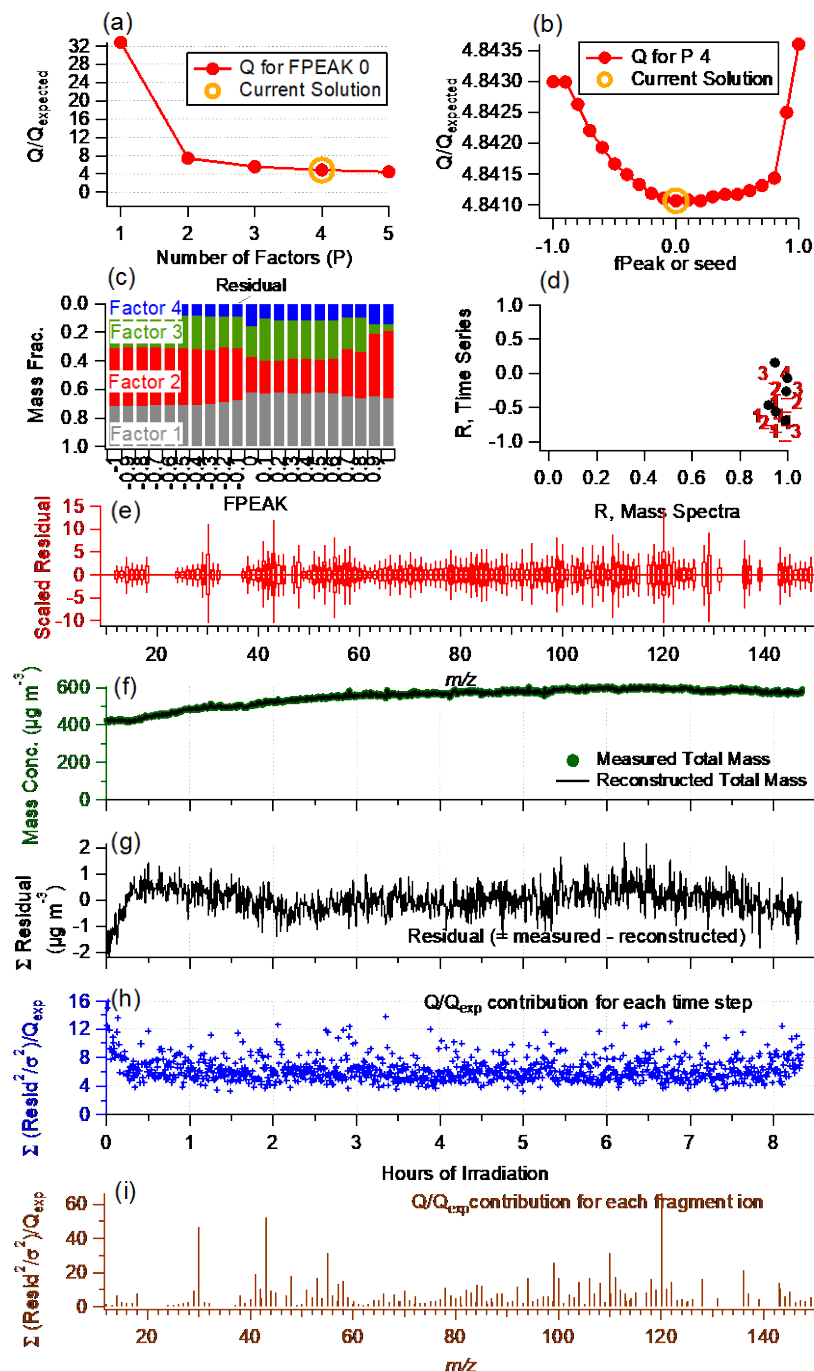

**Figure S4.** Summary of key diagnostic plots of the PMF results: (a)  $Q/Q_{exp}$  as a function of number of factors ( $p$ ) selected for PMF analysis. For the 4-factor solution (b)  $Q/Q_{exp}$  as a function of  $fPeak$ , (c) fractions of PMF factors vs.  $fPeak$ , (d) correlations among PMF factors, (e) the box and whiskers plot showing the distributions of scaled residuals for each  $m/z$ , (f) time series of the measured organic mass and the reconstructed organic mass, (g) variations of the residual (= measured - reconstructed) of the fit, (h) the  $Q/Q_{exp}$  for each point in time, and (i) the  $Q/Q_{exp}$  values for each ion.

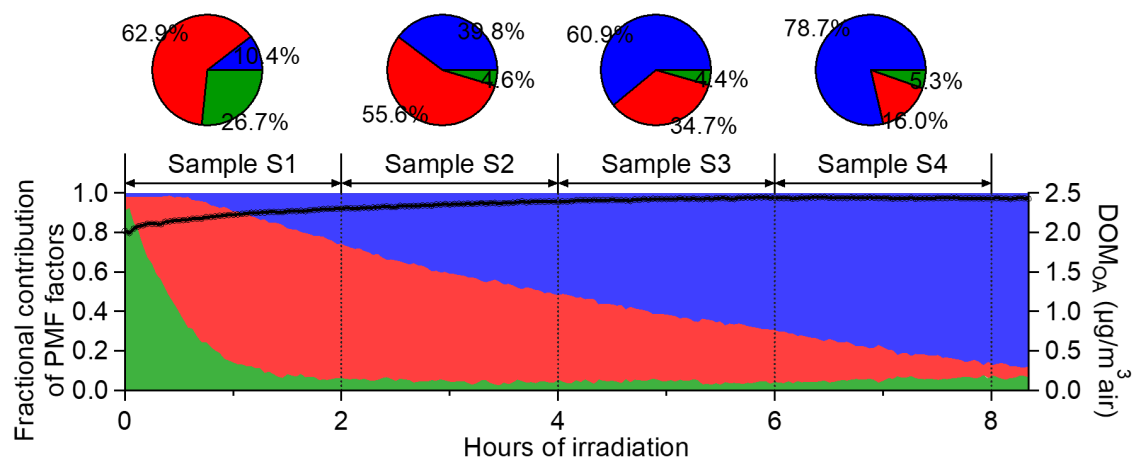

**Figure S5.** Fractional contributions of different PMF factors (from the 3-factor PMF solution) to DOM<sub>OA</sub> in fog water samples collected at four irradiation intervals: S1 (0 – 2h), S2 (2–4 h), S3 (4–6 h) and S4 (6–8 h).

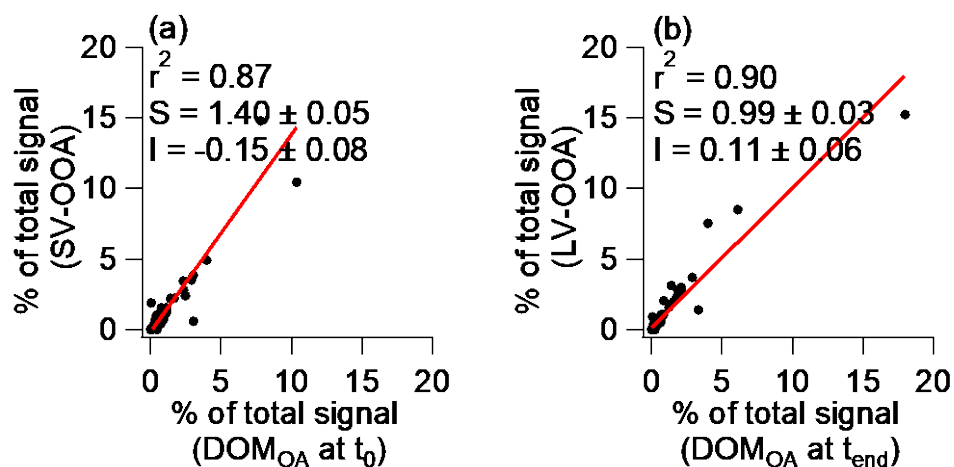

**Figure S6.** Scatter plots that compare the mass spectrum of SV-OOA and LV-OOA observed in ambient aerosols in Fresno in 2013 with the mass spectra of DOM<sub>OA</sub> at  $t_0$  and  $t_{\text{end}}$ , respectively. All linear regressions were performed using orthogonal distance regression (ODR) and the slopes (S), intercepts (I), and correlation coefficients ( $r^2$ ) are shown in the legends.

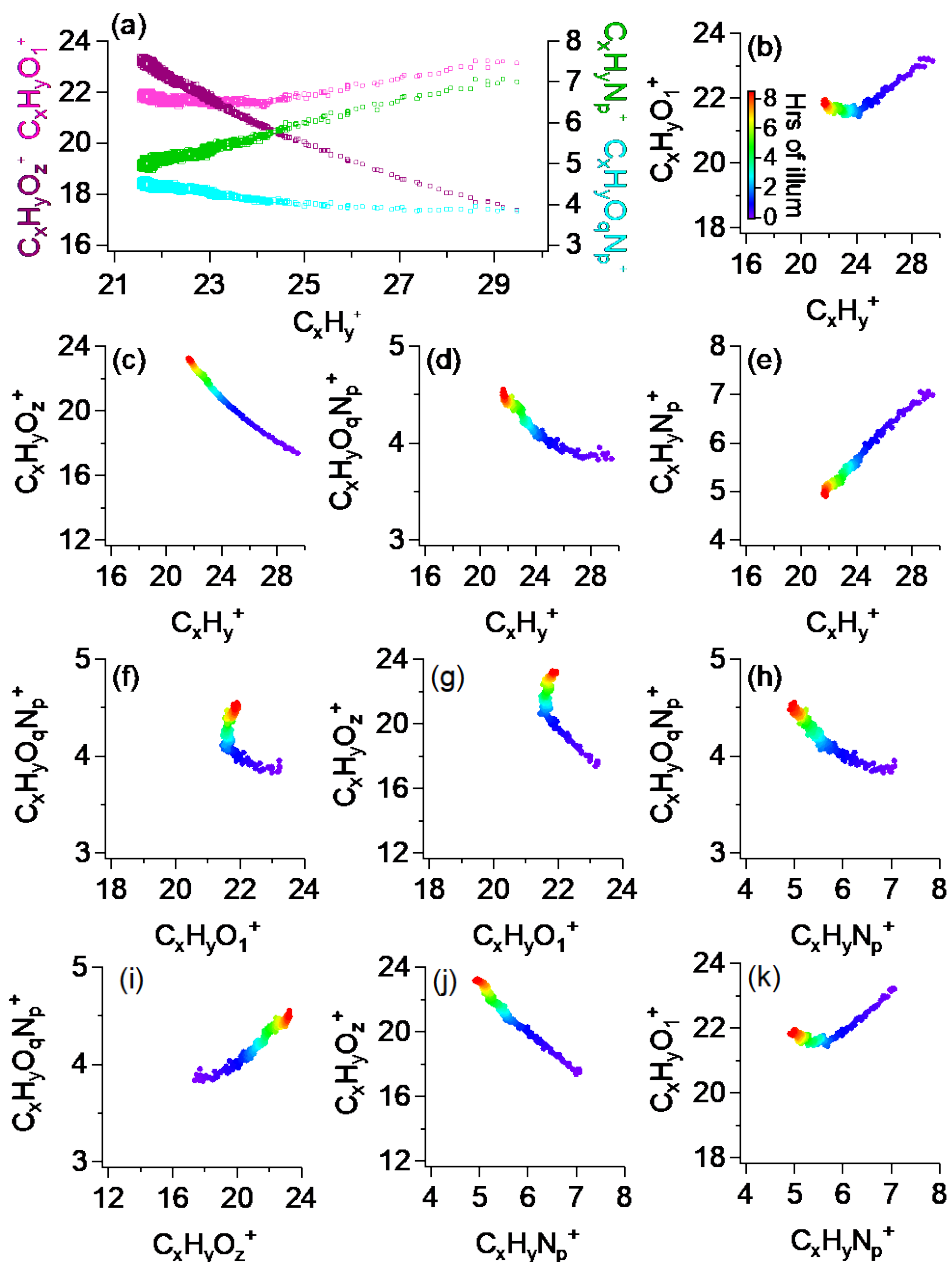

**Figure S7.** Correlations among signal contributions of major ion categories to DOM<sub>OA</sub> spectra during simulated sunlight illumination. **(a)** Signal contributions (%) of  $C_xH_yO_1^+$ ,  $C_xH_yO_z^+$ ,  $C_xH_yN_p^+$ , and  $C_xH_yO_qN_p^+$  plotted against  $C_xH_y^+$  ( $x \geq 1$ ;  $y \geq 1$ ;  $z > 1$ ;  $p \geq 1$ ;  $q \geq 1$ ). Each ion category is shown in a different color and symbol size scaled to irradiation time. **(b-k)** Pairwise correlations between the signal contributions (%) of  $C_xH_yO_1^+$ ,  $C_xH_yO_z^+$ ,  $C_xH_yN_p^+$ ,  $C_xH_yO_qN_p^+$ , and  $C_xH_y^+$ . Data points are color-coded by hours of illumination (see color bar in b).



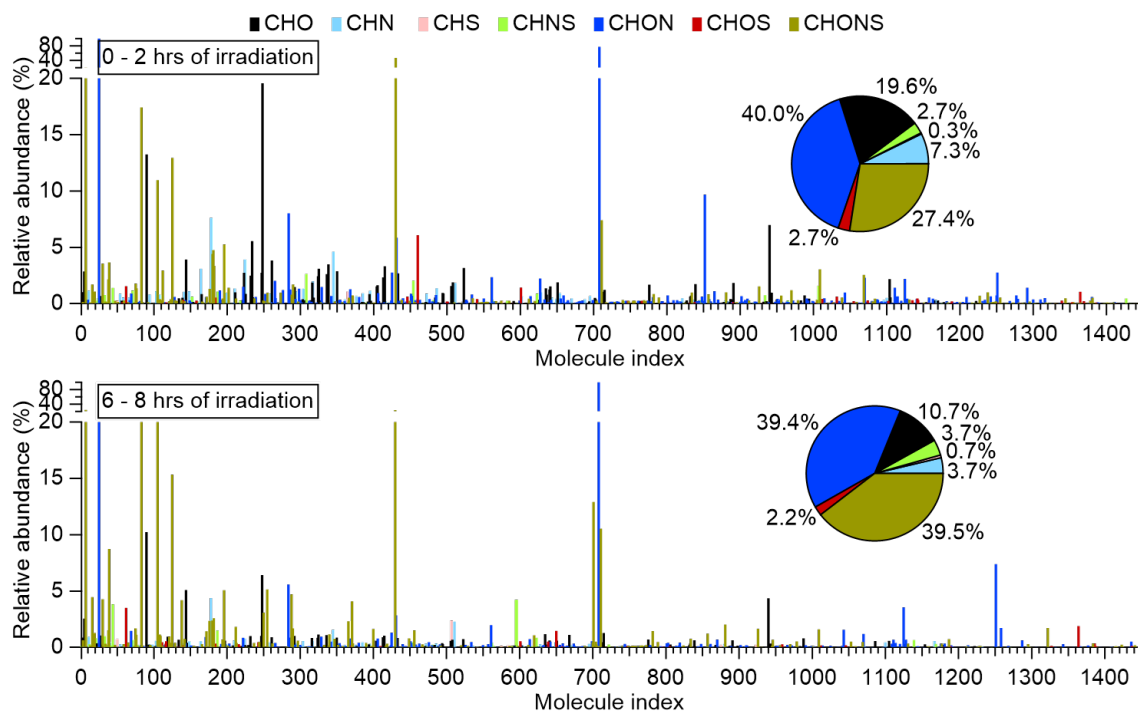

**Figure S8.** Molecular formulas detected by positive-mode ESI-MS in fog water samples collected during 0 – 2 hours (top) and 6 – 8 hours (bottom) of simulated sunlight irradiation. Bars display the relative signal intensities of individual molecular species, color-coded by elemental composition groups: CHO, CHN, CHS, CHNS, CHON, CHOS, CHONS. Accompanying pie charts summarize the fractional contributions of each group to the total signal.

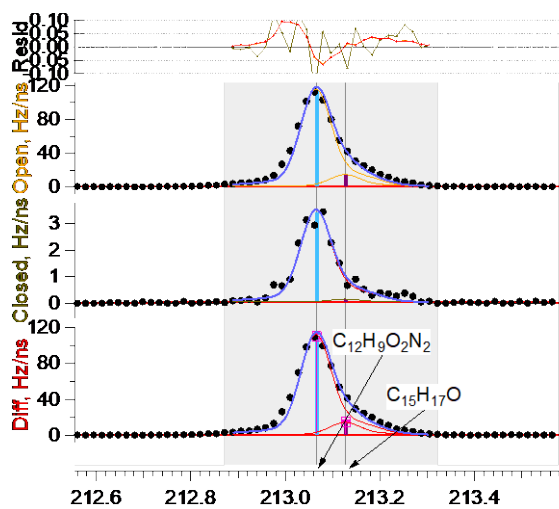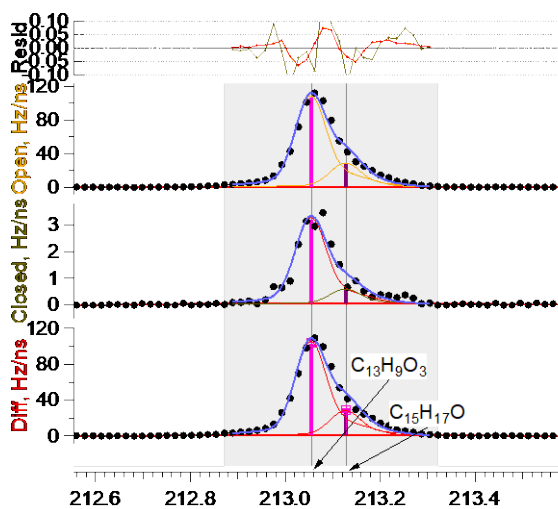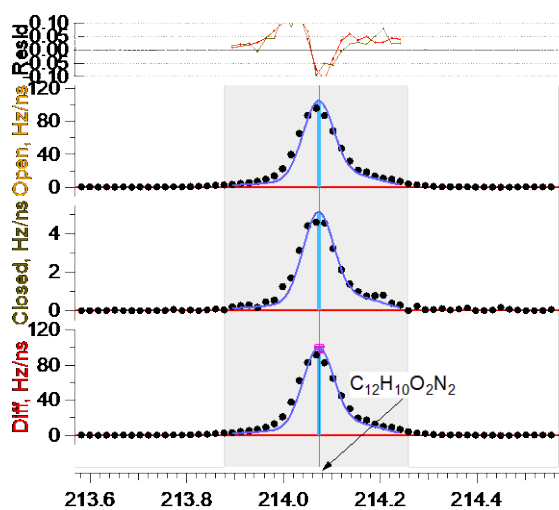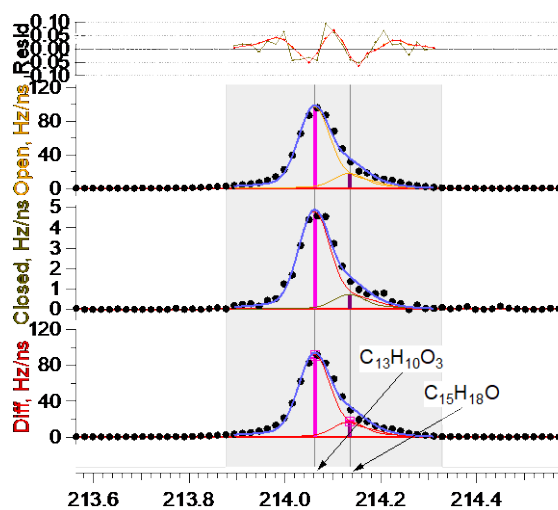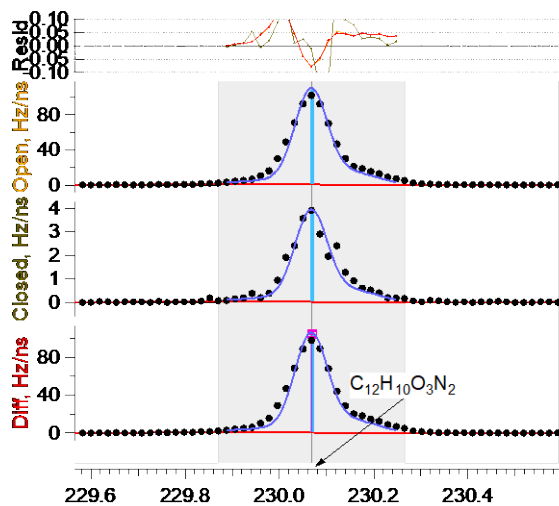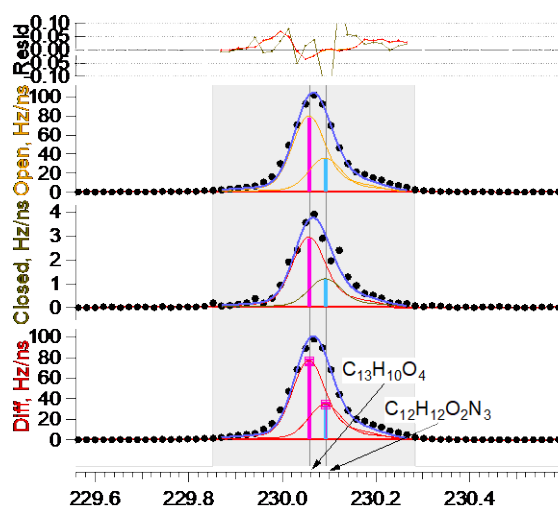

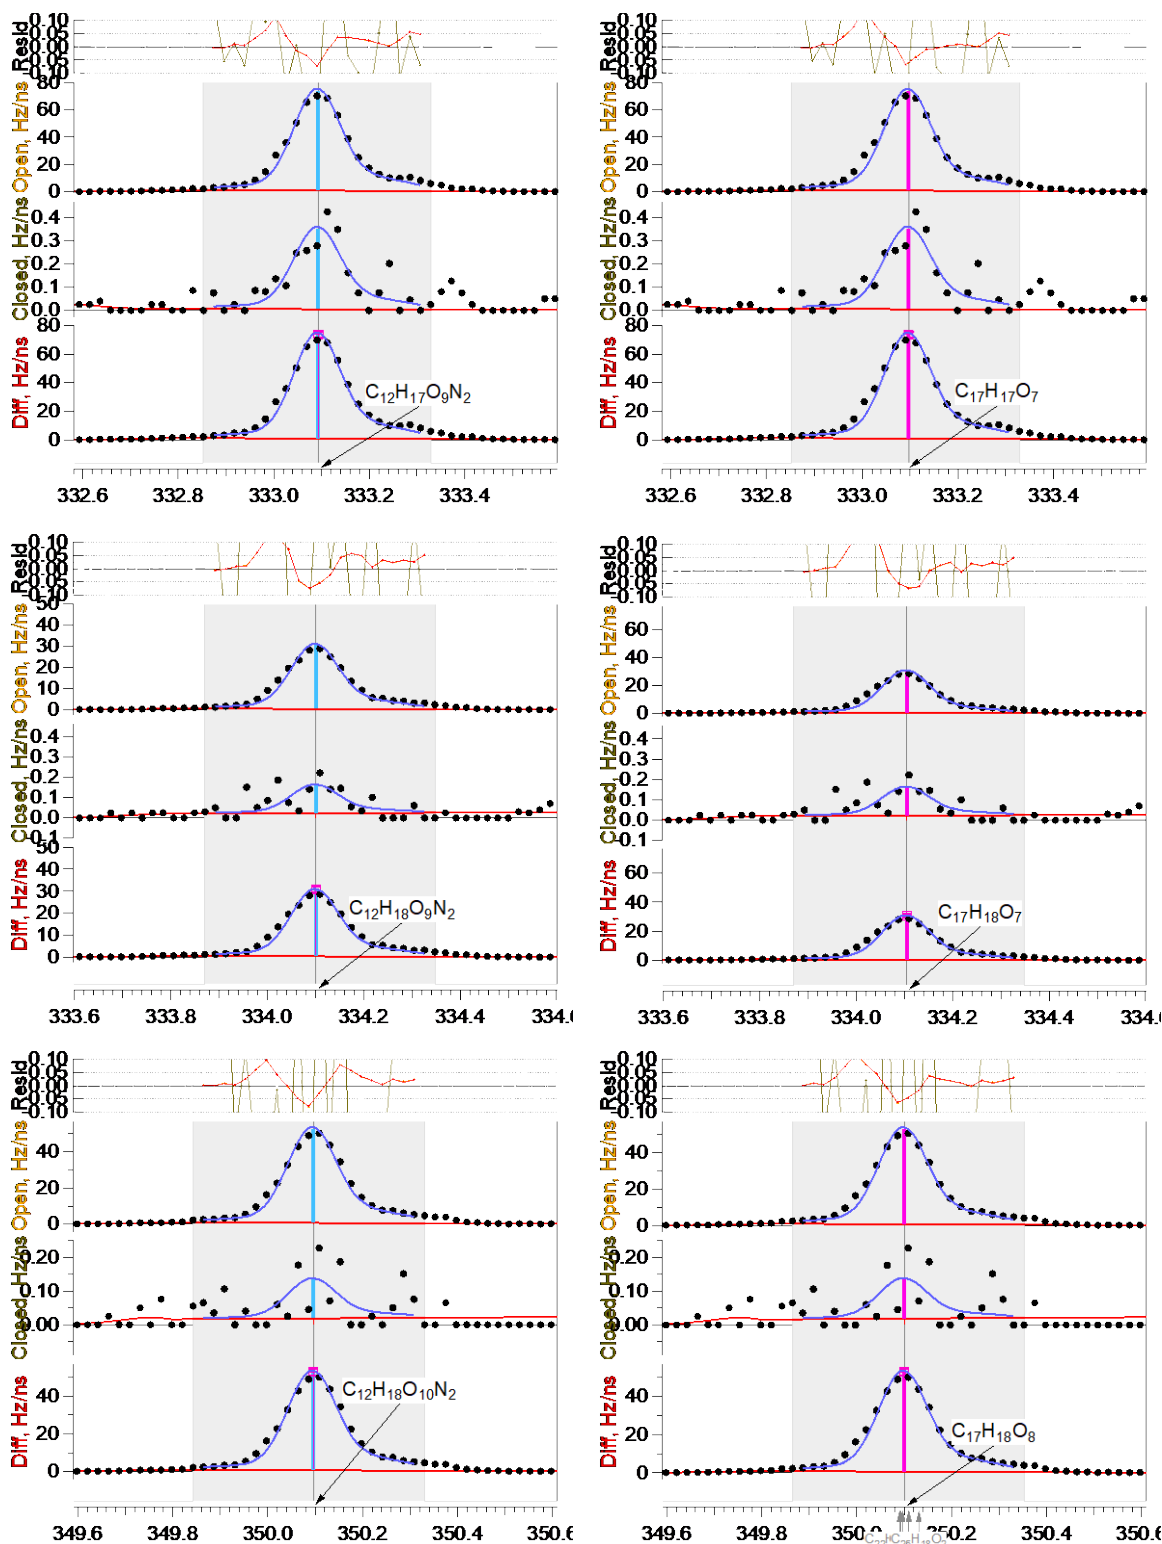

**Figure S9.** PIKA ion fitting of selected high  $m/z$  peaks in the HR-AMS spectra of DOM<sub>OA</sub> at  $t_{\text{end}}$ . Panels display fitted ion signals at  $m/z$  213, 214, 230, 333, 334, and 350. For each  $m/z$ , two fits are shown: the left panels assume elemental compositions containing C, H, O and N; the right panels assume compositions with only C, H, and O.

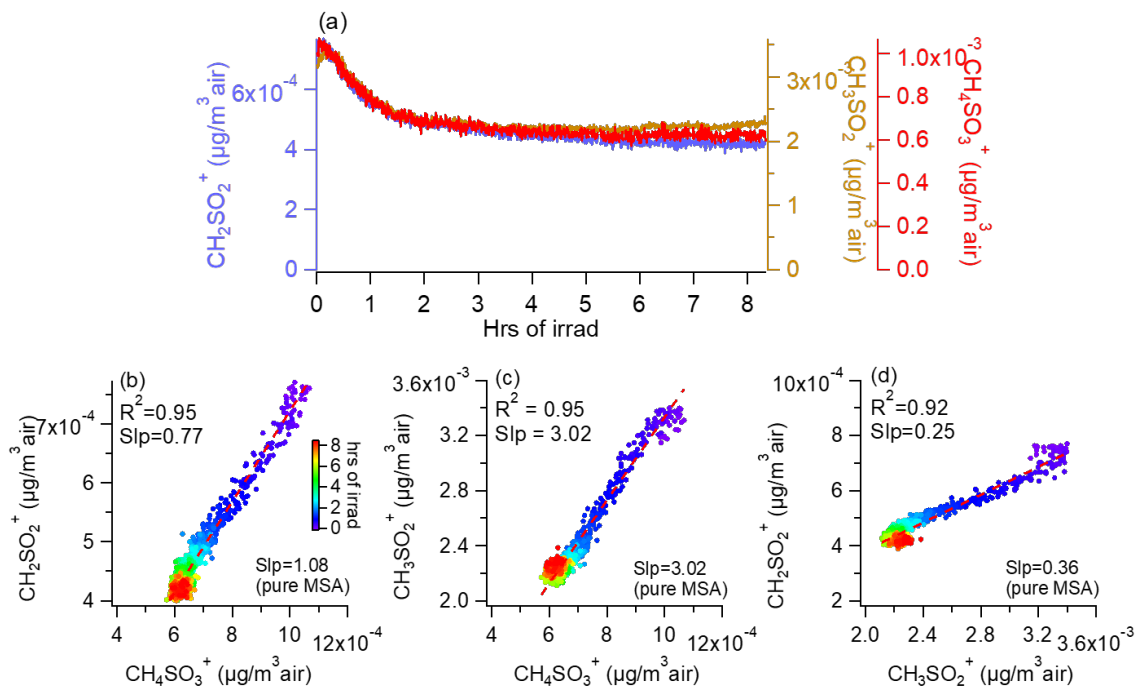

**Figure S10. (a)** Time trends of HR-AMS tracer ions for MSA (Ge et al. 2012),  $\text{CH}_2\text{SO}_2^+$ ,  $\text{CH}_3\text{SO}_2^+$ , and  $\text{CH}_4\text{SO}_3^+$ , during simulated sunlight illumination. **(b -d)** Pairwise correlations among the three ions, with orthogonal distance regression (ODR) slopes (S), intercepts (I), and correlation coefficients ( $r^2$ ) shown in each panel. Data points are color-coded by hours of illumination (see color bar in b).

## References

- Ge, Xinlei, Qi Zhang, Yele Sun, Christopher R. Ruehl, and Ari Setyan. 2012. “Effect of Aqueous-Phase Processing on Aerosol Chemistry and Size Distributions in Fresno, California, during Wintertime.” *Environmental Chemistry* 9(3):221–35.
